# Supplementary material
Source: PubMed Central journal article supplement (PMC4082802)

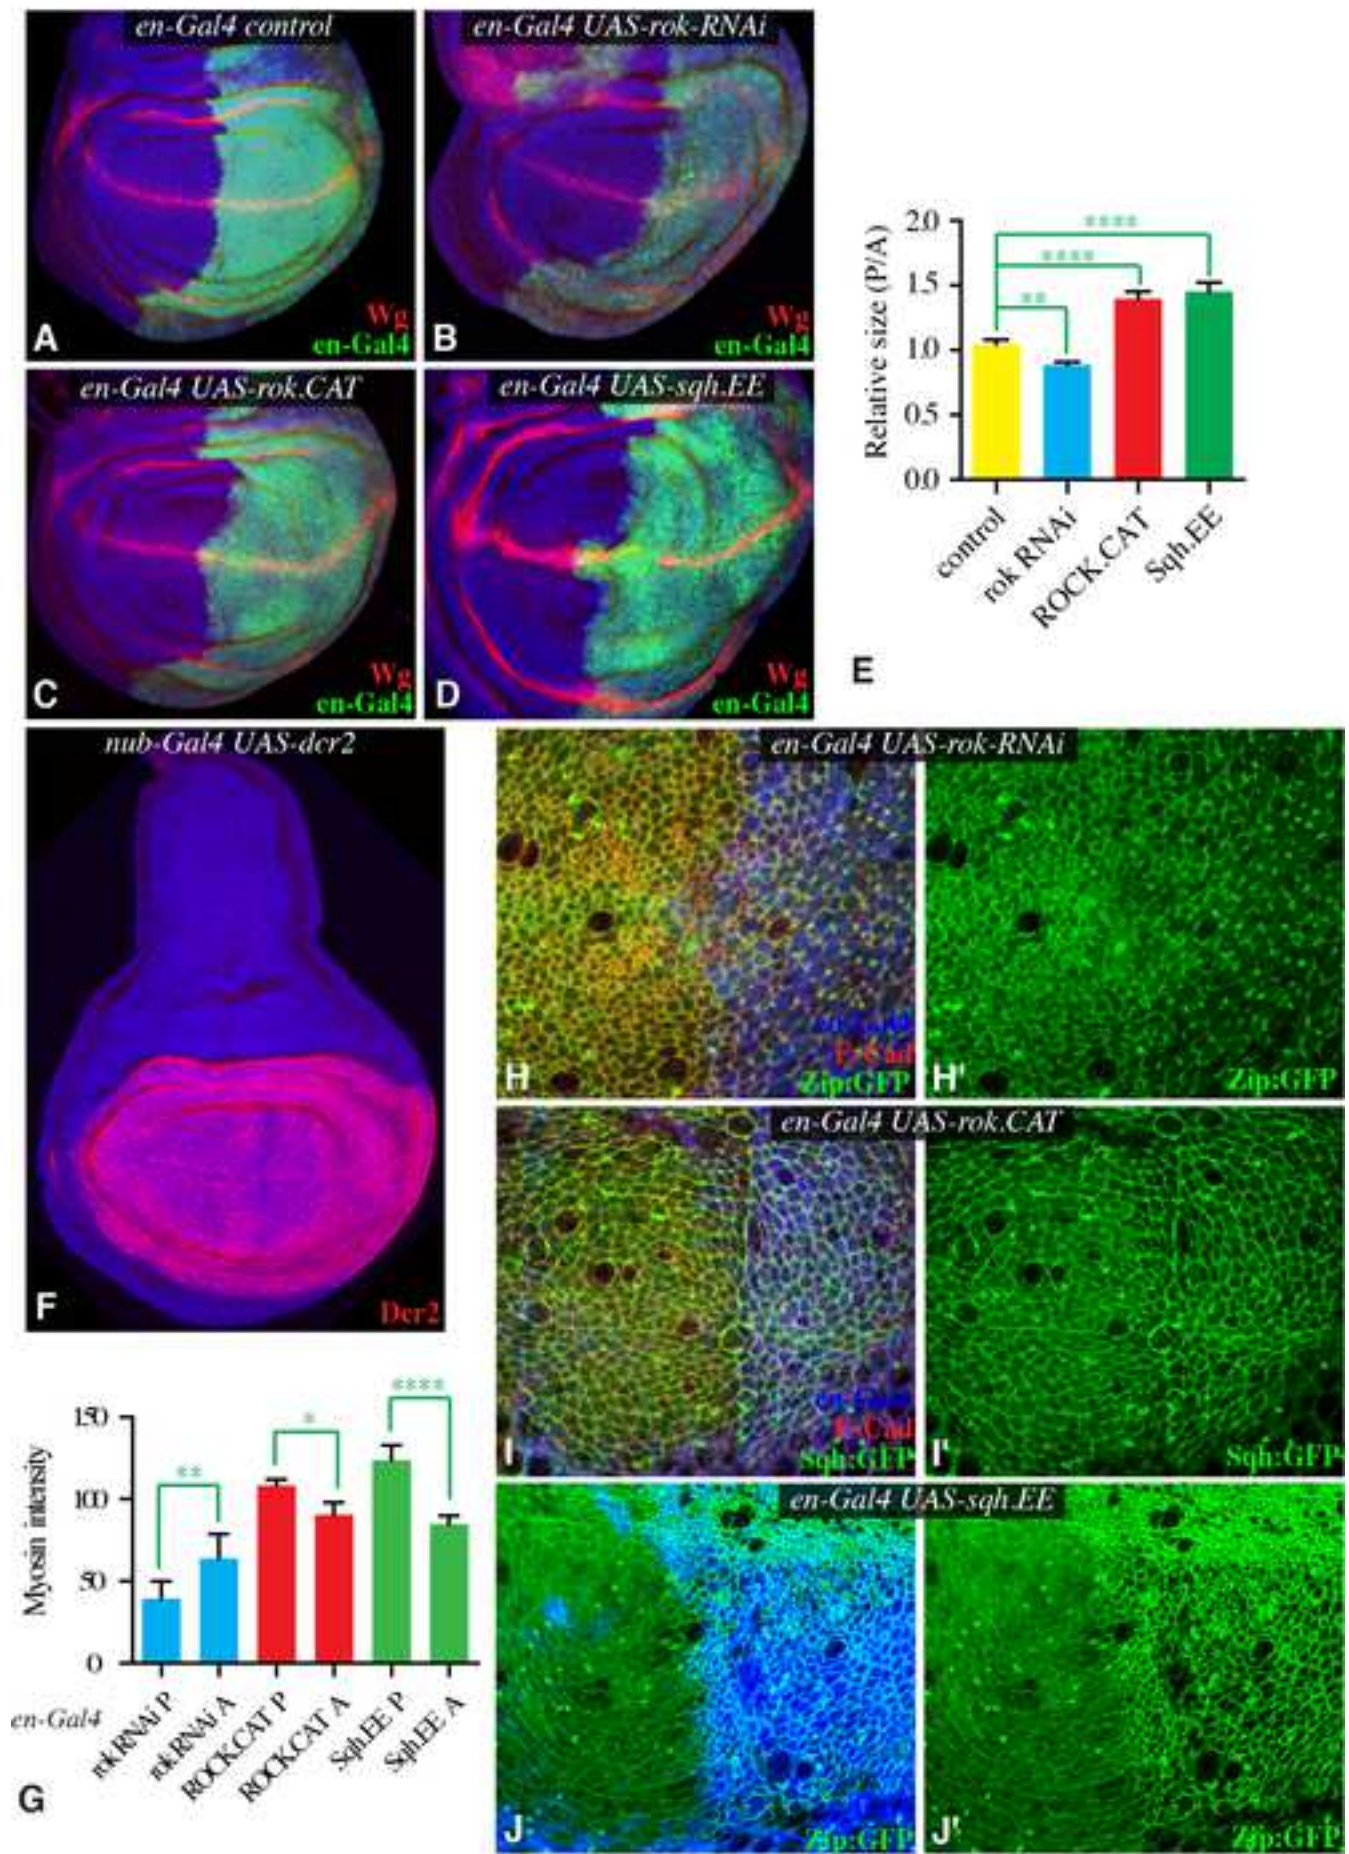

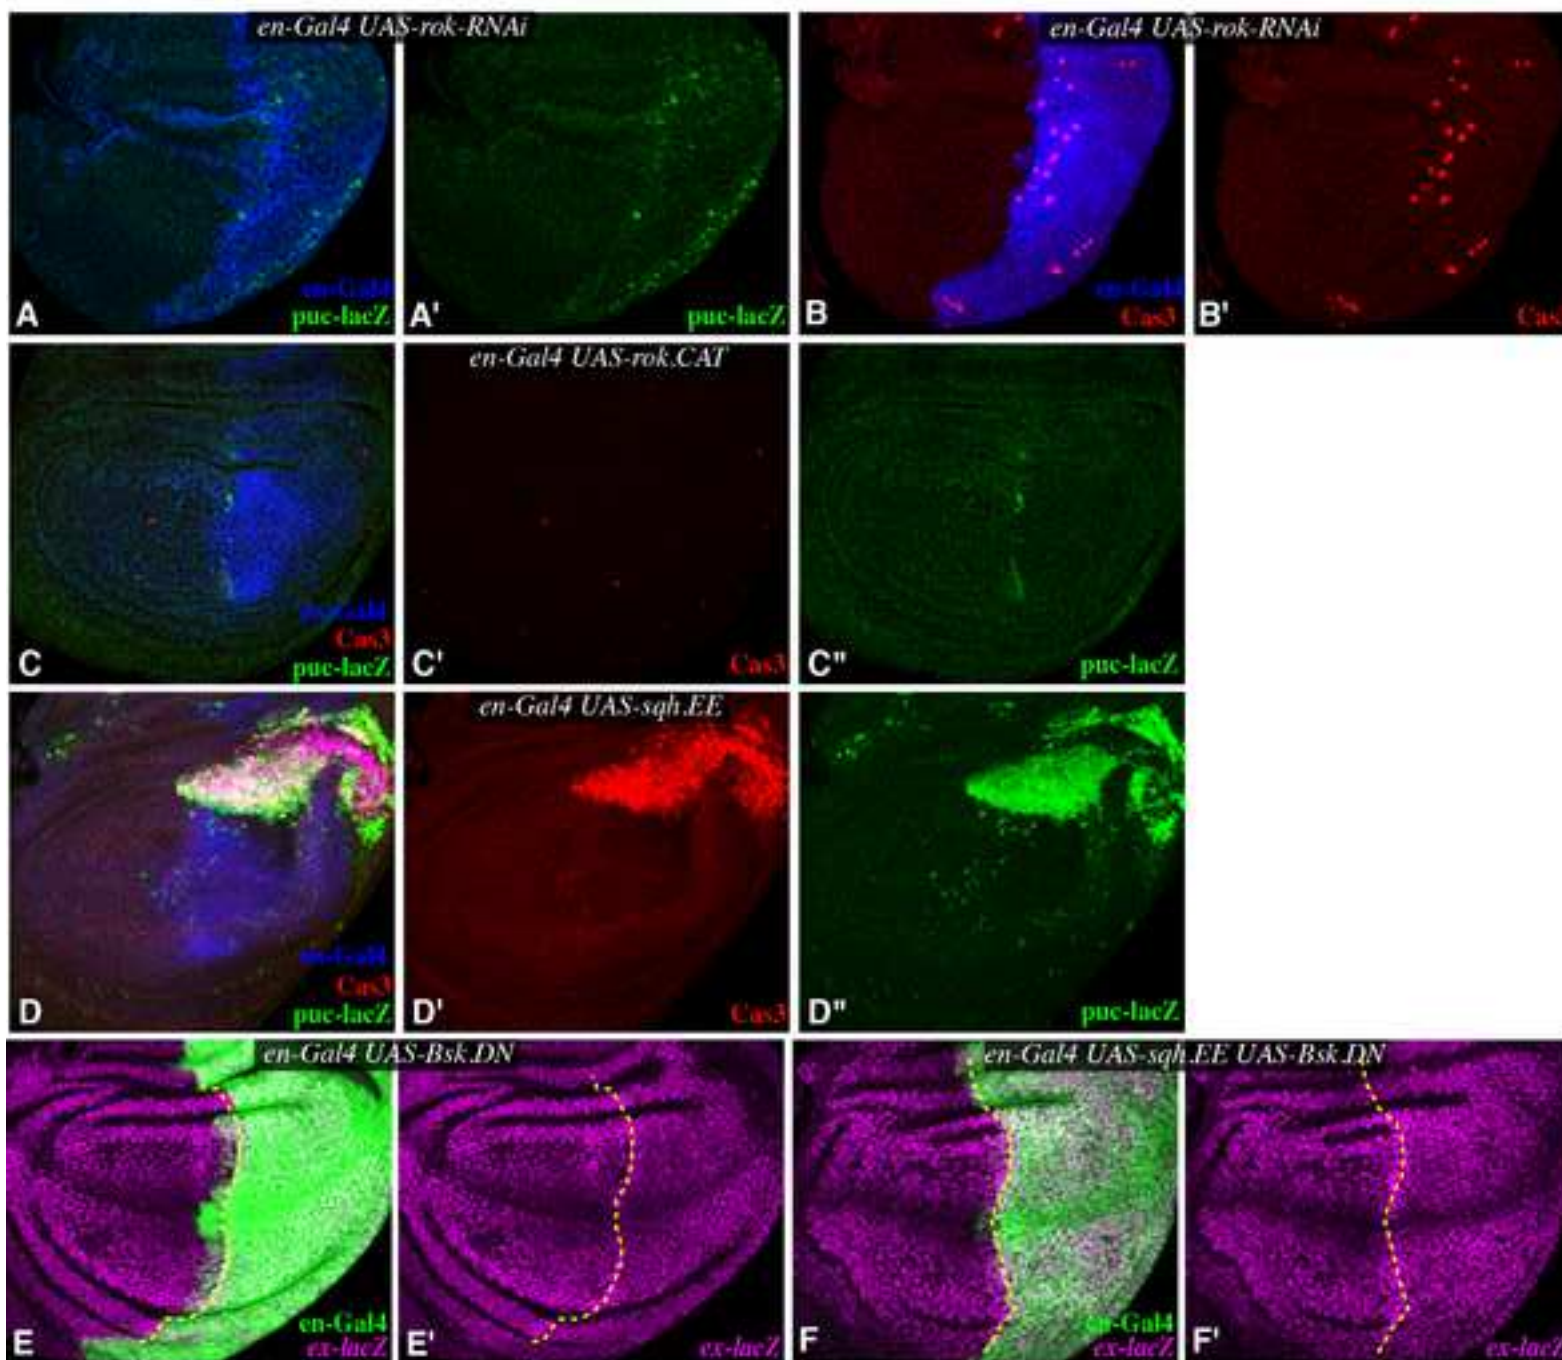

Figure S3 Rauskolb et al

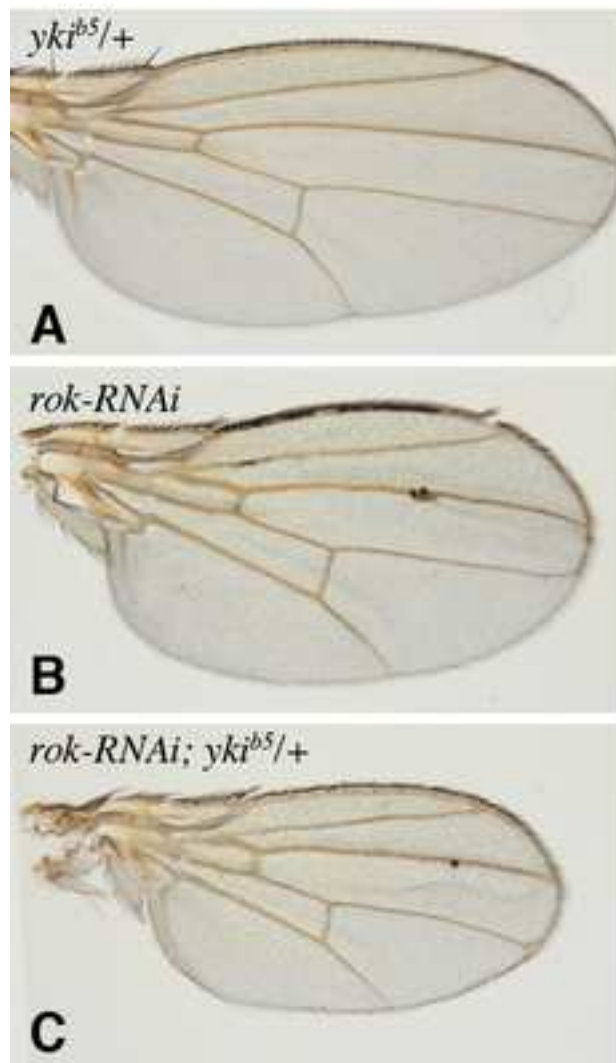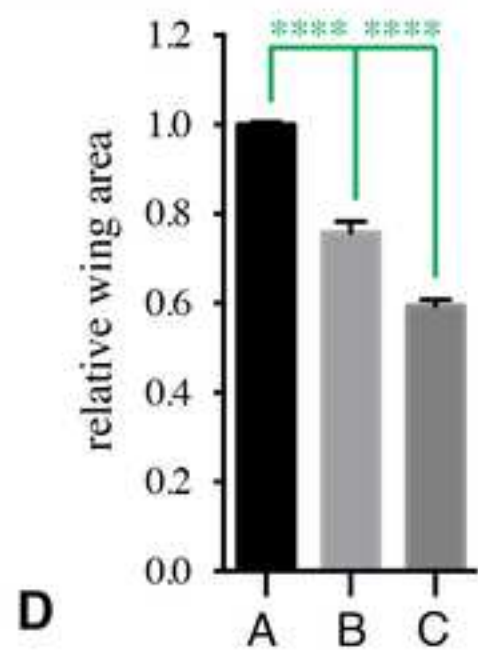

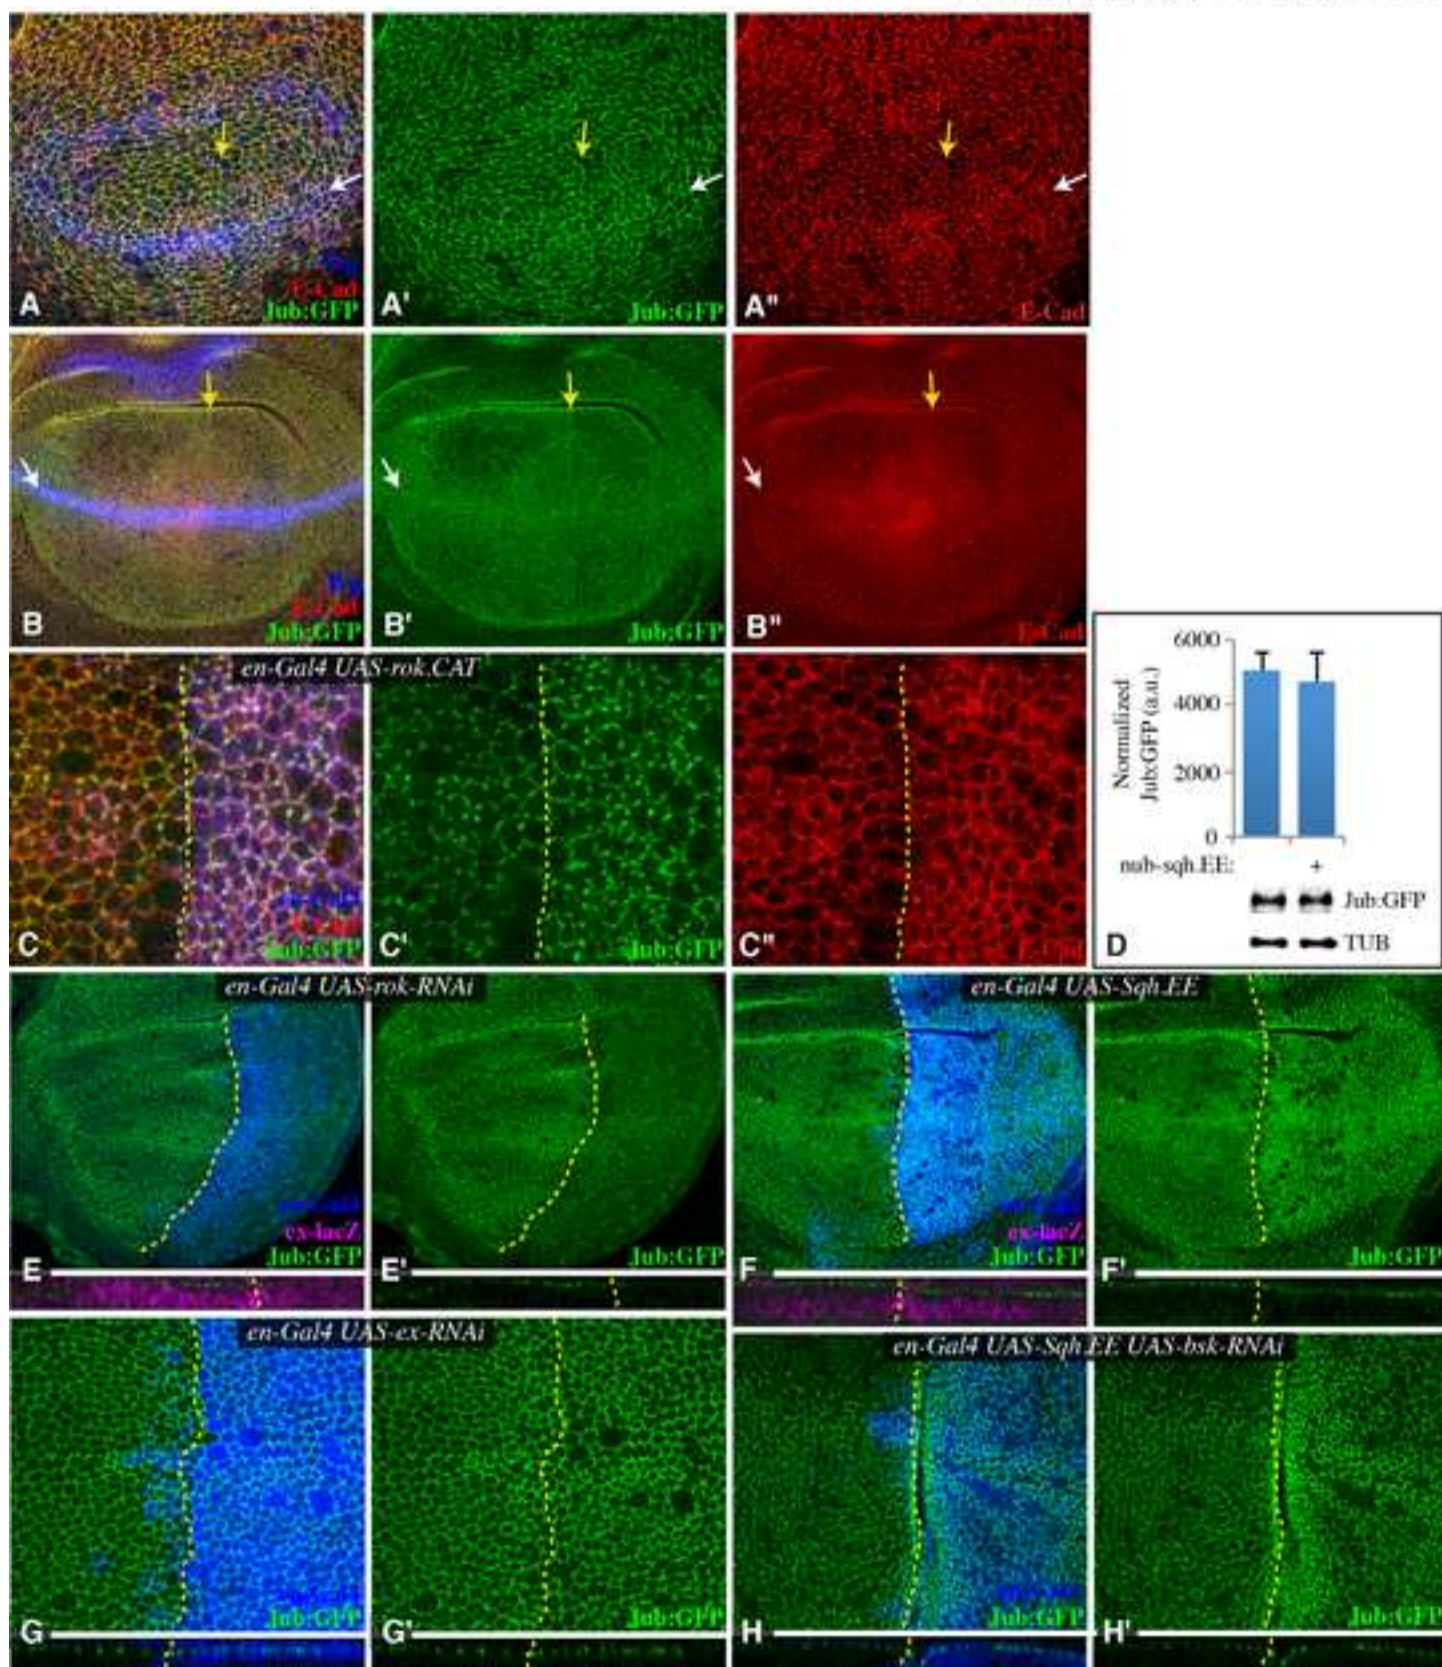

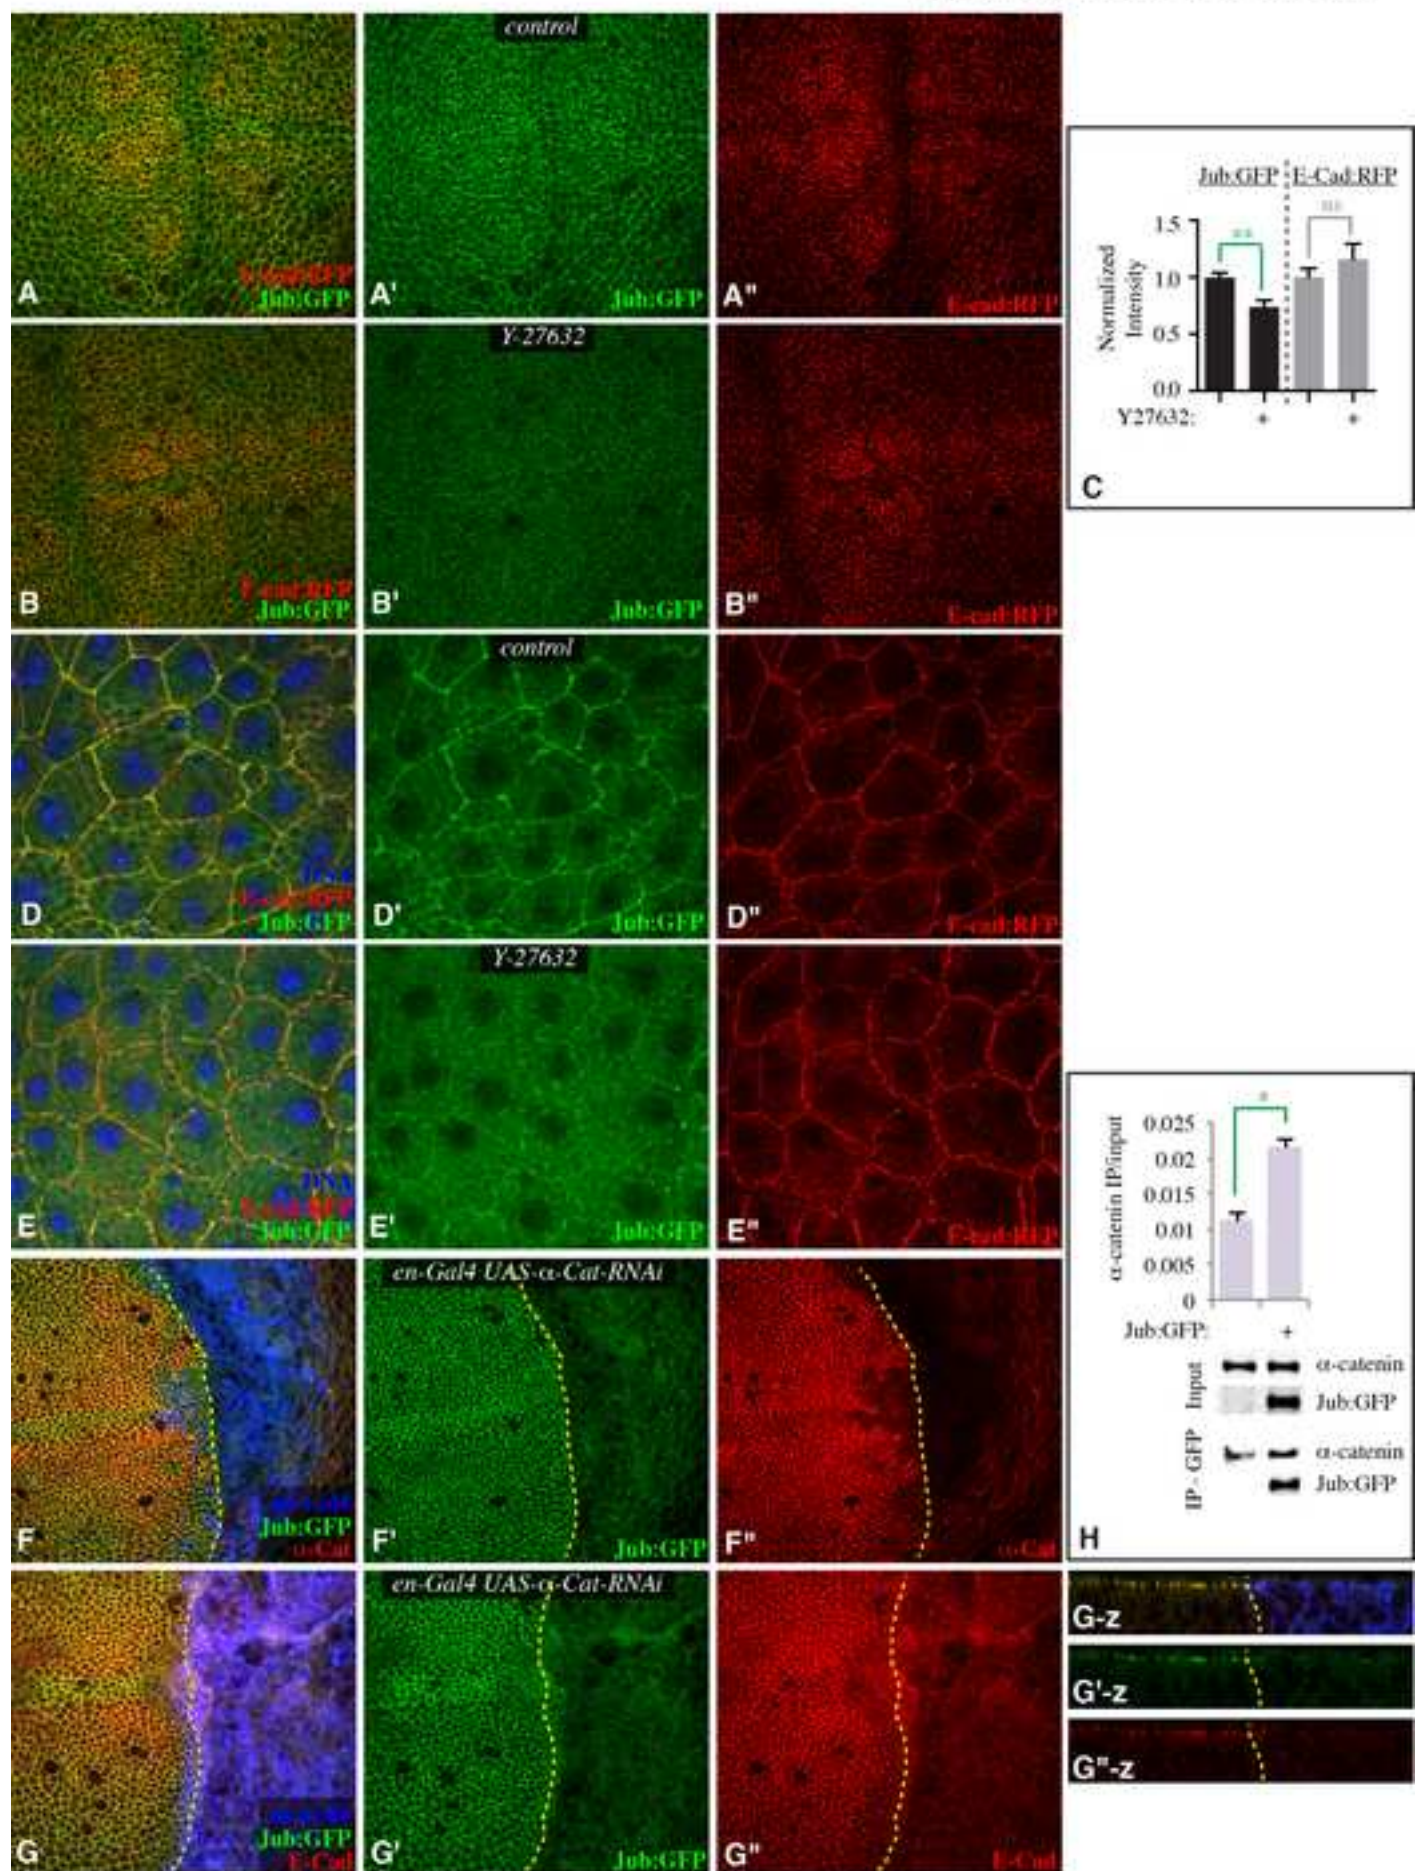

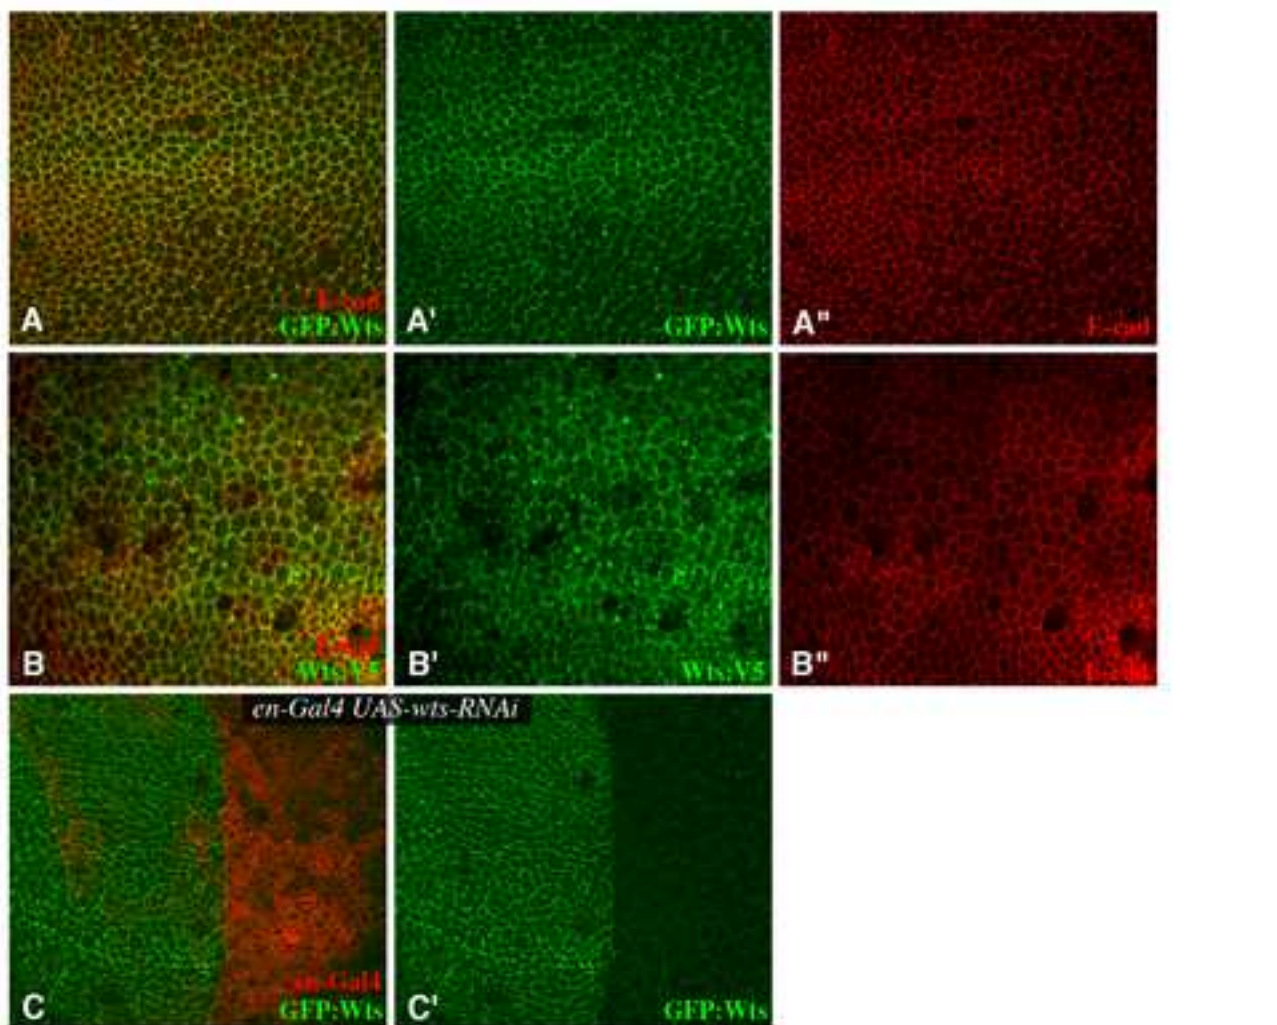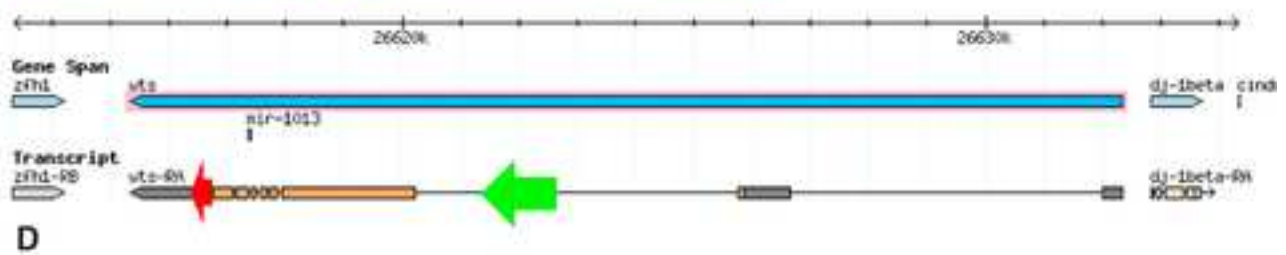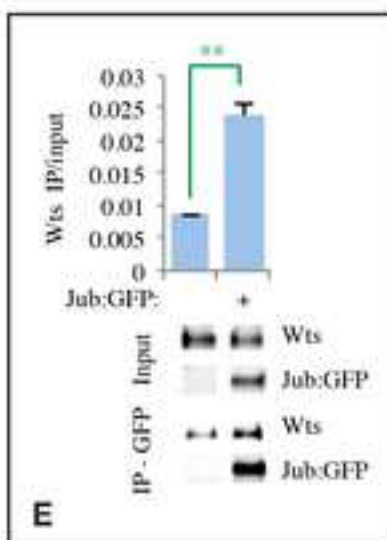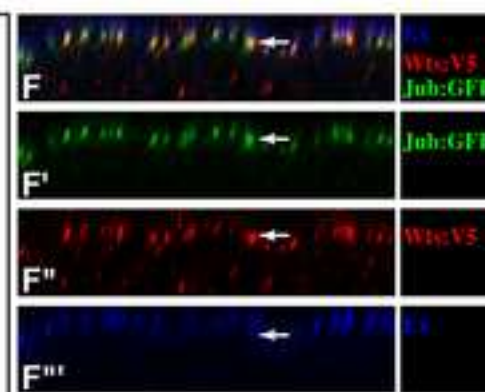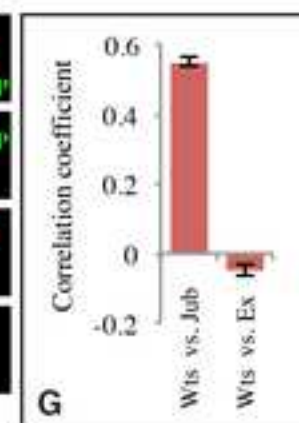

Supplement: NIHMS604590-supplement-02.pdf [file NIHMS604590-supplement-02.pdf]
